# Supplementary material
Source: PubMed Central journal article supplement (PMC5134902)
Supplement: NIHMS824373-supplement-permissions.pdf [file NIHMS824373-supplement-permissions.pdf]

# Acknowledgment Permission Form

**Journal:** *Stroke*

**Manuscript No:** 014161DR1

**First Author:** Teresa Santiago-Sim

**Title of Work:** "THSD1 Mutation in the Pathogenesis of Intracranial Aneurysm and Subarachnoid Hemorrhage".

Authors must provide written permission/approval from all individuals mentioned by name in the Acknowledgements section of a submitted manuscript. By signing this form, any and all acknowledged persons therefore state that they have read and approved the mention of their names in the Acknowledgment section of the aforementioned paper.

**Printed Name:** MARIA LI LUNG

**Signature:** 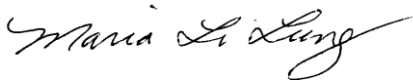

**Date:** October 14, 2016

# Acknowledgment Permission Form

**Journal:** *Stroke*

**Manuscript No:** 014161DR1

**First Author:** Teresa Santiago-Sim

**Title of Work:** "THSD1 Mutation in the Pathogenesis of Intracranial Aneurysm and Subarachnoid Hemorrhage".

Authors must provide written permission/approval from all individuals mentioned by name in the Acknowledgements section of a submitted manuscript. By signing this form, any and all acknowledged persons therefore state that they have read and approved the mention of their names in the Acknowledgment section of the aforementioned paper.

**Printed Name:** Hiromitsu Nakauchi

**Signature:** *Hiro Nakauchi*

**Date:** 10.18.2016

## Acknowledgment Permission Form

Journal: *Stroke*

Manuscript No: 014161DR1

First Author: Teresa Santiago-Sim

Title of Work: "THSD1 Mutation in the Pathogenesis of Intracranial Aneurysm and Subarachnoid Hemorrhage".

Authors must provide written permission/approval from all individuals mentioned by name in the Acknowledgements section of a submitted manuscript. By signing this form, any and all acknowledged persons therefore state that they have read and approved the mention of their names in the Acknowledgment section of the aforementioned paper.

Printed Name: David Bennett

Signature: *David Bennett*

Date: 10/18/2016

# Acknowledgment Permission Form

Journal: Stroke

Manuscript No: 014161DR1

First Author: Teresa Santiago-Sim

Title of Work: "THSD1 Mutation in the Pathogenesis of Intracranial Aneurysm and Subarachnoid Hemorrhage".

Authors must provide written permission/approval from all individuals mentioned by name in the Acknowledgements section of a submitted manuscript. By signing this form, any and all acknowledged persons therefore state that they have read and approved the mention of their names in the Acknowledgment section of the aforementioned paper.

Printed Name:

Michelle L. Farley

Signature:

Michelle L. Farley

Date:

18 October 2016
